# Supplementary material
Source: publisher figshare collection journal article supplement (https://acs.figshare.com/ndownloader/files/22226304)
Supplement: Supplementary file 1 [file 22226304]

## Supporting information

- Effect of increased variables on the EE of leuprolide and D (0.5) in formulations; kinetics of leuprolide loss during secondary homogenization process and in-liquid drying process.

*Table S1. Effect of increased variables on the EE of leuprolide and D (0.5) in formulations.*

| Parameters ↑                         | Change of EE    | Change of D (0.5)        |
|--------------------------------------|-----------------|--------------------------|
| Polymer supplier/                    | Resomer ↑       | Resomer ↑                |
| Gelatin bloom number                 | ↑               | ↑                        |
| Polymer concentration                | ↑               | ↑                        |
| 1 <sup>st</sup> water phase volume   | Not significant | ↑                        |
| 1 <sup>st</sup> homogenization speed | (slightly) ↑    | ↑                        |
| 1 <sup>st</sup> homogenization time  | ↓               | Standard is the smallest |
| 2 <sup>nd</sup> homogenization time  | ↓               | ↓                        |
| 2 <sup>nd</sup> water phase volume   | ↓               | ↑                        |
| Stir rate (rpm)                      | ↑               | Not significant          |

Note: ↑ and ↓ indicates upregulation and downregulation.

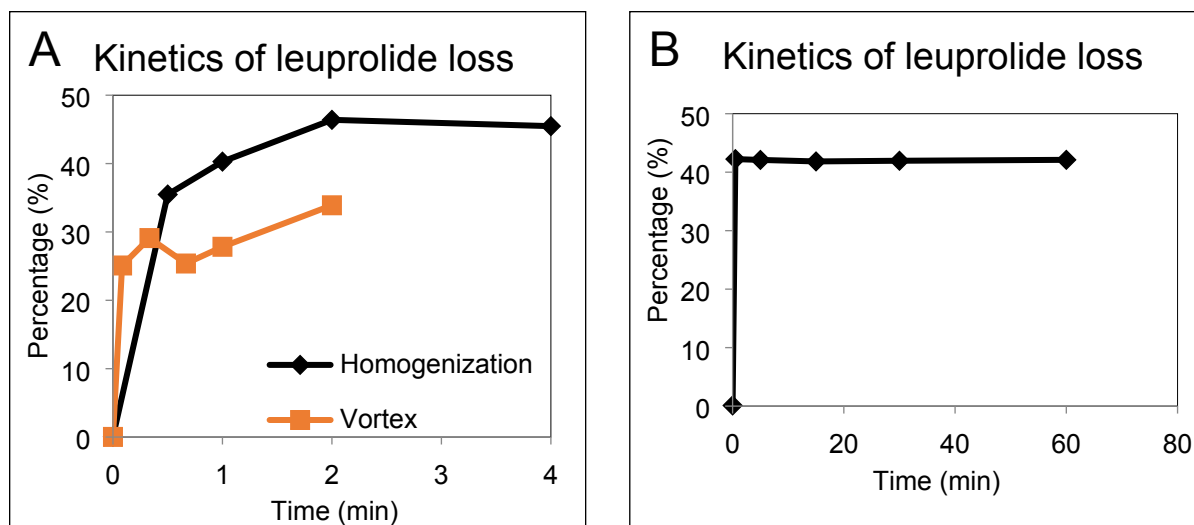

Figure S1. Kinetics of leuprolide loss during secondary homogenization process (A) and in-liquid drying process (B).
